# Supplementary material for: Bridges to Access 2024: The Role of Multidisciplinary Conferences in Enhancing Policy Knowledge and Advocacy Confidence in Health Professional Students and Healthcare Professionals
Source: Research Square preprint supplement (doi:10.21203/rs.3.rs-8301099/v1), 2026-01-16
Supplement: Supplementary file 1 [file 595255891fa52b7989660532.docx]

The survey instrument was developed by the study team specifically for this study to assess conference attendees’ knowledge, attitudes, and advocacy confidence related to healthcare policy, health disparities, and access to care. The surveys were administered anonymously before and after the conference.

**Pre-Conference Survey**

**Introductory Statement:**
Please fill out our anonymous survey to help us improve Bridges to Access. Participation is voluntary, and there are no negative consequences for choosing not to participate. You may stop the survey at any time.

1. What is your age?
2. What is your gender identity?
3. If you are an OUHSC student, which college are you enrolled in? *Mark only one.*
   1. College of Medicine
   2. College of Dentistry
   3. College of Nursing
   4. College of Pharmacy
   5. College of Allied Health
   6. College of Public Health
   7. Graduate College
4. If you are not an OUHSC student, what is your profession?

Rate your current knowledge level on the following topics (Q5-Q12) using a scale from 1 to 5, with 1 being very low and 5 being very high (Please utilize horizontal scroll if you are on a mobile device):

1. Gender-Affirming Care
2. Tribal Health and Health Policy
3. Prescription Drug Costs and Pharmaceutical Industry
4. Race-Based Disparities in Healthcare
5. Reproductive Health Disparities
6. Refugee Healthcare and Resettlement Challenges
7. Substance Use Recovery and Accessible Healing
8. Healthcare Coverage and Insurance Policies

Please rate your agreement with the following statements (Q13-Q16) using a scale from 1 to 5, with 1 being strongly disagree and 5 being strongly agree (please utilize horizontal scroll if you are on a mobile device):

1. “Healthcare policy and advocacy are important topics for healthcare professionals.”
2. “I feel confident in my ability to advocate for marginalized patient populations.”
3. “I believe addressing health disparities should be a priority in healthcare.”
4. “I feel confident in my ability to educate others about how policy affects the delivery and access of healthcare.”
5. Have you done any advocacy work before? If yes, please explain.
6. Is there any kind of advocacy work you would like to do that you have not done before? If yes, please explain.

**Post-Conference Survey**

**Introductory Statement:**
Please fill out our anonymous survey to help us improve Bridges to Access. Participation is voluntary, and there are no negative consequences for choosing not to participate. You may stop the survey at any time.

1. What is your age?
2. What is your gender identity?
3. If you are an OUHSC student, which college are you enrolled in? Select only one.
   1. College of Medicine
   2. College of Dentistry
   3. College of Nursing
   4. College of Pharmacy
   5. College of Allied Health
   6. College of Public Health
   7. Graduate College
4. If you are not an OUHSC student, what is your profession?

Rate your current knowledge level on the following topics (Q5-Q12) using a scale from 1 to 5, with 1 being very low and 5 being very high (Please utilize horizontal scroll if you are on a mobile device):

1. Gender-Affirming Care
2. Tribal Health and Health Policy
3. Prescription Drug Costs and Pharmaceutical Industry
4. Race-Based Disparities in Healthcare
5. Reproductive Health Disparities
6. Refugee Healthcare and Resettlement Challenges
7. Substance Use Recovery and Accessible Healing
8. Healthcare Coverage and Insurance Policies

Please rate your agreement with the following statements (Q13-Q16) using a scale from 1 to 5, with 1 being strongly disagree and 5 being strongly agree (please utilize horizontal scroll if you are on a mobile device):

1. “Healthcare policy and advocacy are important topics for healthcare professionals.”
2. “I feel confident in my ability to advocate for marginalized patient populations.”
3. “I believe addressing health disparities should be a priority in healthcare.”
4. “I feel confident in my ability to educate others about how policy affects the delivery and access of healthcare.”
5. Have you done any advocacy work before? If yes, please explain.
6. Is there any kind of advocacy work you would like to do that you have not done before? If yes, please explain.
7. Which room did you attend in Breakout Session #1 (10:30-11:30AM)? *Mark only one.*
   1. Gender Affirming Care in Oklahoma Panel
   2. Tribal Health and Health Policy Panel
   3. Prescription Drug Costs and Big Pharma Panel
   4. Race-Based Disparities in Health Care
8. Which room did you attend in Breakout Session #2 (12:30-1:30PM)? *Mark only one.*
   1. Reproductive Health Advocacy Panel
   2. Refugee Healthcare Panel: Obstacles on the Way to Healthy Resettlement
   3. Accessible Healing Panel: Over-the-Counter Narcan and Substance Use Recovery
   4. Healthcare Coverage Panel: How Insurance Affects Patients and Providers
9. Have your attitudes or perceptions changed as a result of attending the conference? If yes, please explain.
10. Do you have any suggestions for improving future iterations of the conference?
11. How was your conference experience?
